# Supplementary material
Source: PubMed Central journal article supplement (PMC4975576)
Supplement: NIHMS786882-supplement.pdf [file NIHMS786882-supplement.pdf]

## Appendix 1.

### eMethods.

**Categorization of field triage status:** We determined field triage status (positive versus negative) based on any of the following: trauma triage criteria specified in the EMS chart; EMS provider documented “trauma system entry” (or similar charting, depending on local terminology); EMS-recorded trauma identification number (used at some sites as a mechanism for tracking injured patients entered into the trauma system); a matched trauma registry record specifying a “scene” (EMS-identified) trauma patient; or a matched phone record from the base hospital specifying a triage-positive patient (for sites requiring EMS personnel to notify trauma centers before arrival). These data sources were triangulated to increase the rigor and validity of the triage status variable. All patients not identified through the above data sources were considered triage negative.

**Development of alternative field triage strategies:** We used classification and regression tree (CART) analysis<sup>29</sup> to generate the two alternative strategies for field triage. CART uses binary recursive partitioning to create decision trees that optimize the identification of a subgroup of patients (i.e.,  $ISS \geq 16$ ) by partitioning the data through a series of splits using potential predictor variables and is well-suited for developing clinical decision rules. The primary target group was patients with “serious injury,” defined as an Injury Severity Score ( $ISS \geq 16$ ), based on previous research demonstrating the survival benefit of treating these patients in major trauma centers.<sup>15-19</sup> We constructed the trees using pre-specified misclassification costs and tree complexity parameters to develop decision rules with: (1) high-sensitivity ( $\geq 95\%$ ) consistent with the national triage benchmark for under-triage and (2) high specificity ( $\geq 65\%$ ) to meet the national benchmark for over-triage.<sup>6</sup> To develop the two alternative triage strategies, we randomly selected 60% of the sample to derive the decision trees and the remaining 40% to validate them (split-sample method). We used cross-validation in the tree derivation process to minimize overfitting of the data and reduce bias in the estimation of rule performance. We considered 33 variables in the tree-building process, including 23 different triage criteria currently in use at the 6 sites, a composite measure of triage status (triage-positive vs. triage-negative), out-of-hospital physiologic measures, age and mechanism of injury. These decision trees should be considered hypothetical scenarios for field triage, but they approximate real-world trade-offs between sensitivity and specificity in triage strategies using information available to EMS.

eFigure 1.

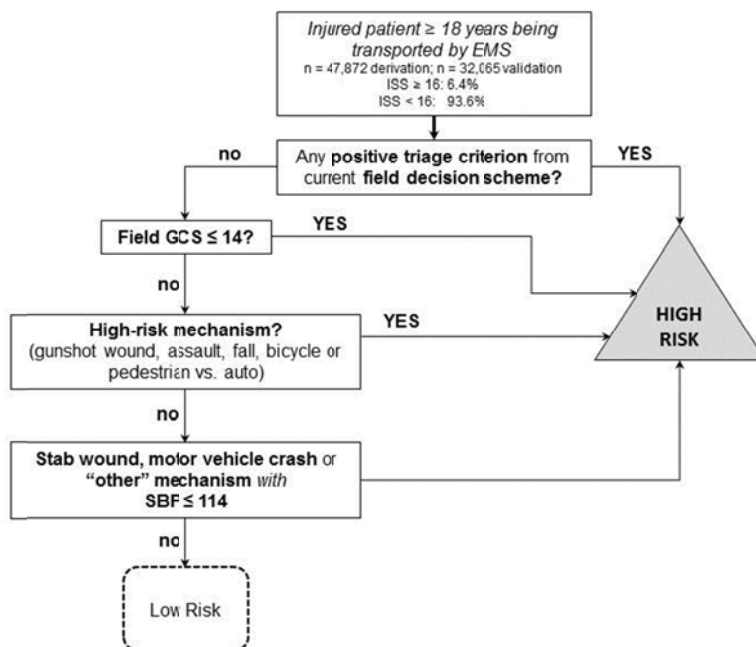

eFigure 2.

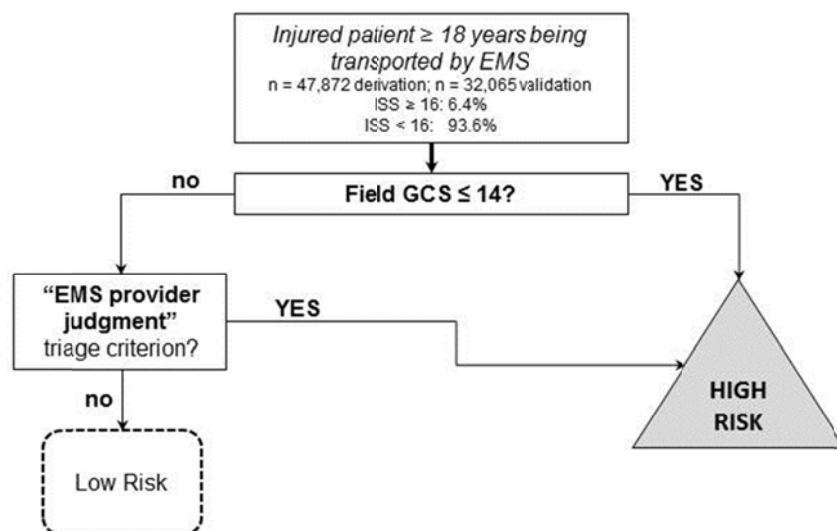

eFigure 3.

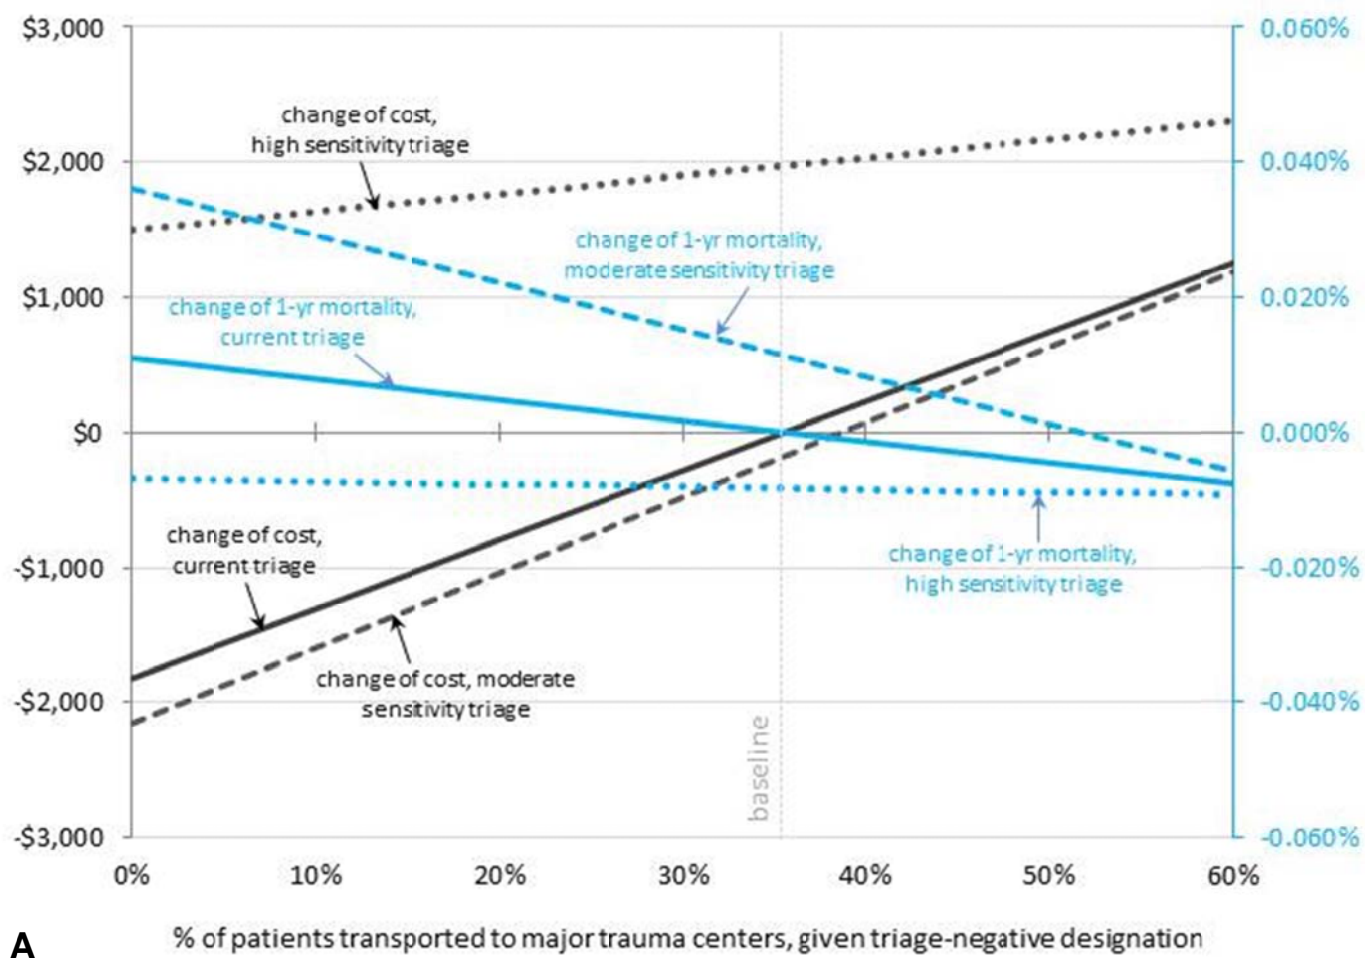

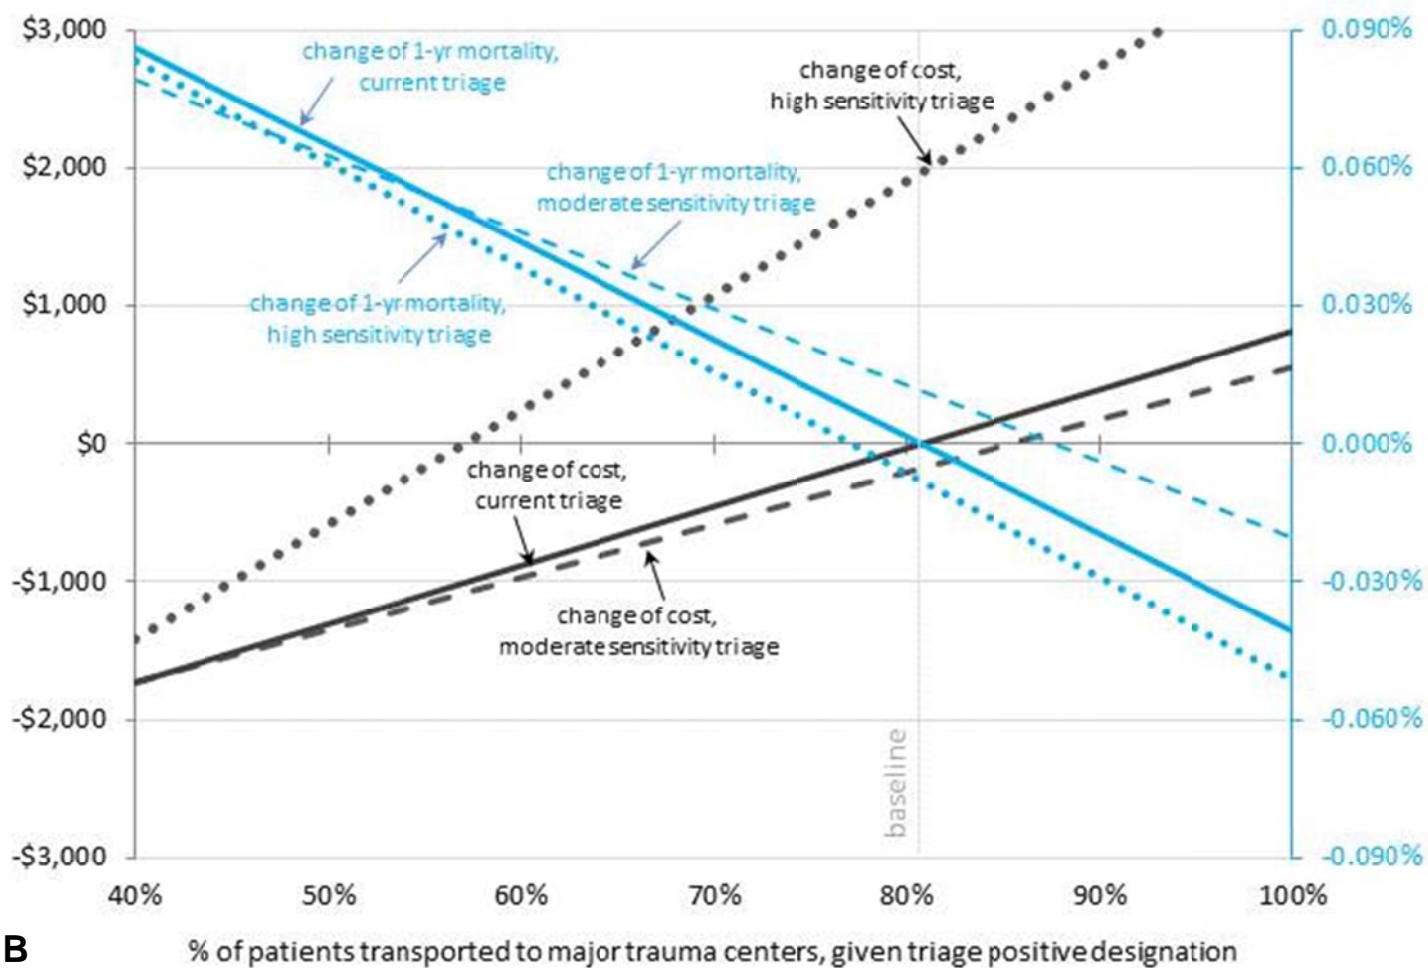

**eFigure 4.**

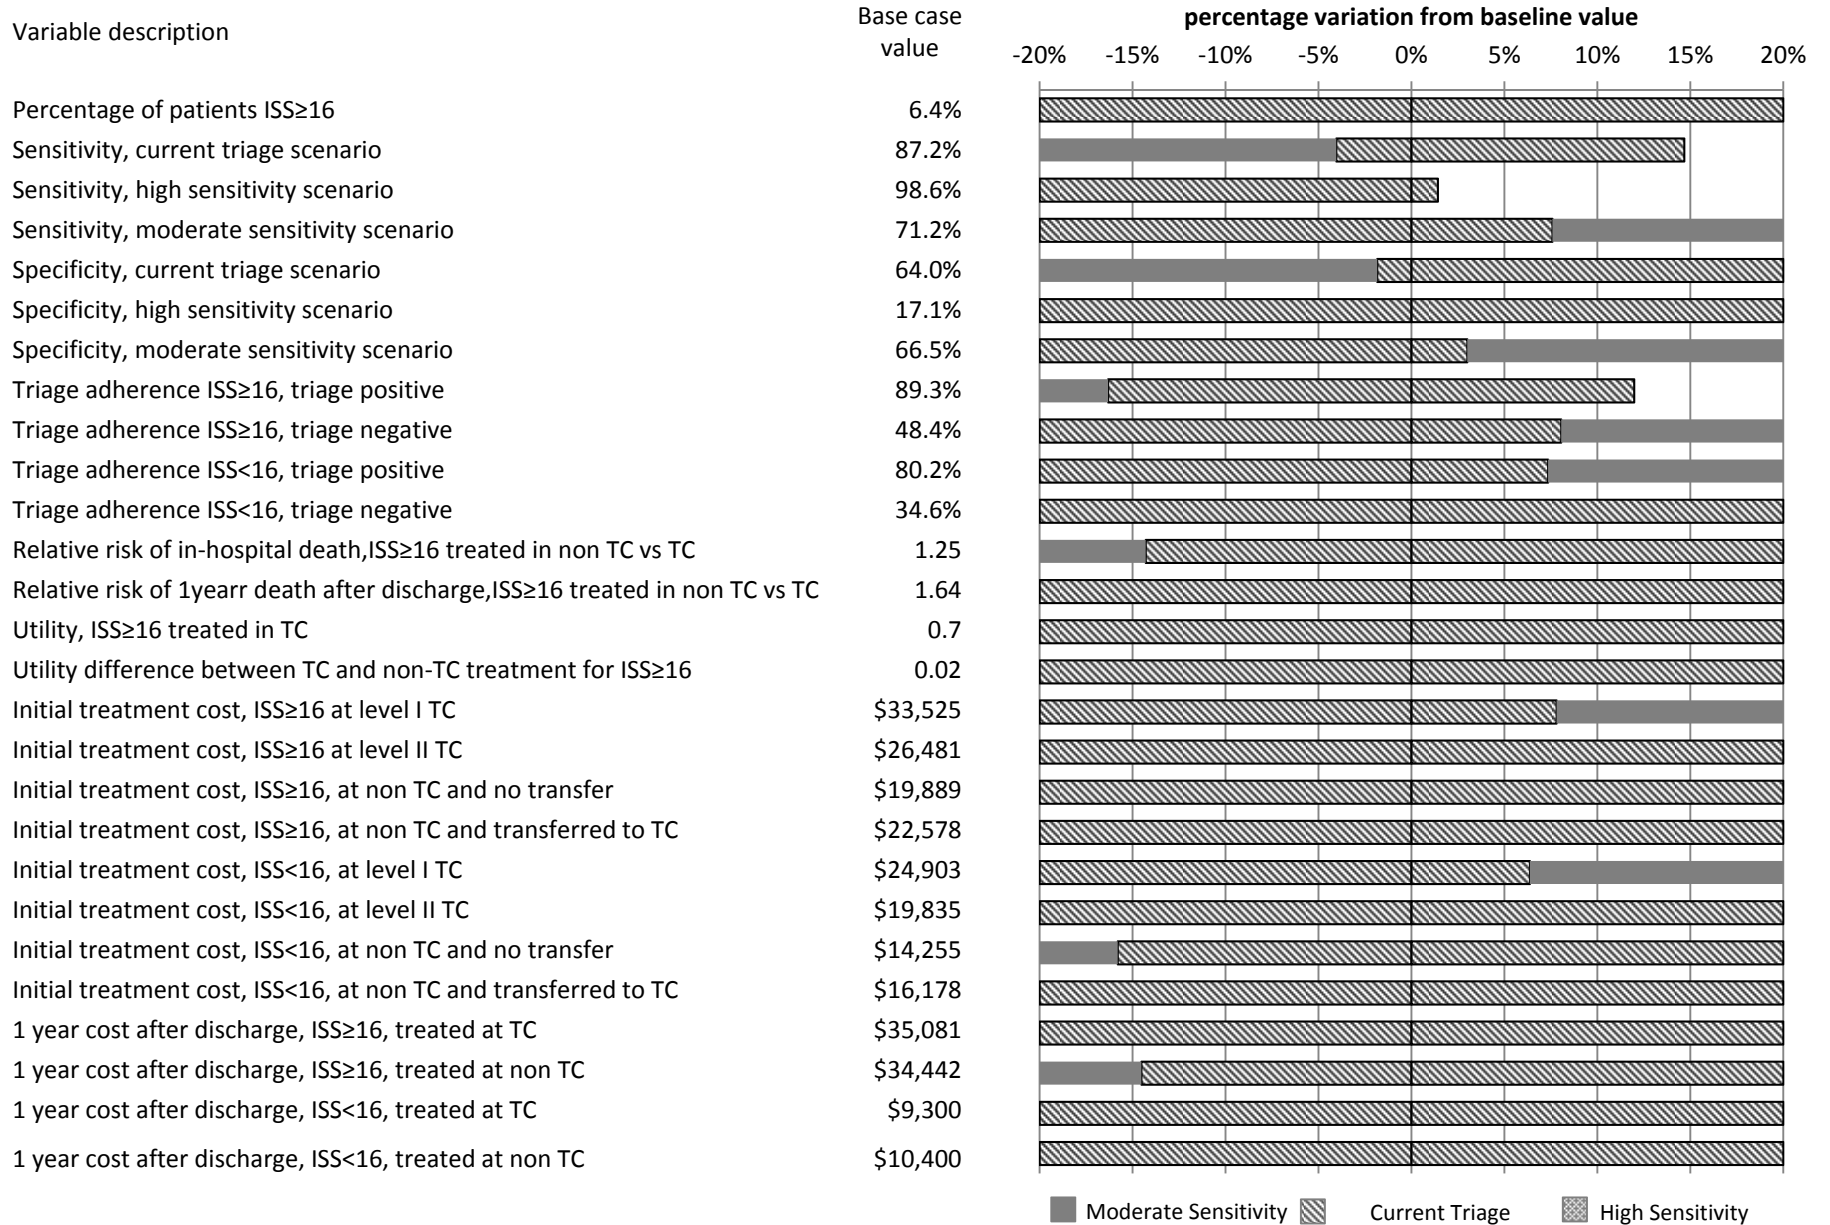



**eTable 1.** Input Parameter Distributions for Sensitivity Analysis

| Description                            | Value (95% CI)   | Distribution type | Distribution parameter |                     |
|----------------------------------------|------------------|-------------------|------------------------|---------------------|
|                                        |                  |                   | alpha/mu               | beta/ sigma /lambda |
| Probability, %                         |                  |                   |                        |                     |
| ISS $\geq$ 16                          | 6.43 (6.26-6.60) | beta*             | 5140                   | 74796               |
| Sensitivity                            |                  |                   |                        |                     |
| Current triage                         | 87.2 (86.3-88.1) |                   | 4479                   | 658                 |
| High specificity                       | 71.2 (70.0-72.5) |                   | 3658                   | 1479                |
| High sensitivity                       | 98.6 (98.3-98.9) |                   | 5065                   | 72                  |
| Specificity                            |                  |                   |                        |                     |
| Current triage                         | 64.0 (63.7-64.4) |                   | 47871                  | 26927               |
| High specificity                       | 66.5 (66.2-66.9) |                   | 49741                  | 25057               |
| High sensitivity                       | 17.1 (16.9-17.4) |                   | 12790                  | 62008               |
| Triage adherence (site transported to) |                  |                   |                        |                     |
| If ISS $\geq$ 16, triage positive      |                  |                   |                        |                     |
| Level I or II TC                       | 89.3 (88.4-90.2) |                   | 4001                   | 479                 |
| Non TC                                 | 10.7 (9.8-11.6)  |                   | N/A                    |                     |
| If ISS $\geq$ 16, triage negative      |                  |                   |                        |                     |
| Level I or IITC                        | 48.4 (44.6-52.2) |                   | 318                    | 338                 |
| Non TC                                 | 51.6 (47.8-55.4) |                   | N/A                    |                     |
| If ISS<16, triage positive             |                  |                   |                        |                     |
| Level I or II TC                       | 80.2 (79.8-80.7) |                   | 21586                  | 5313                |
| Non TC                                 | 19.8 (19.3-20.2) |                   | N/A                    |                     |
| If ISS<16, triage negative             |                  |                   |                        |                     |
| Level I or II TC                       | 34.6 (34.2-35.0) |                   | 16573                  | 31325               |
| Non TC                                 | 65.2 (65.0-65.8) |                   | N/A                    |                     |
| Level 1 among transported to TC        |                  |                   |                        |                     |
| If ISS $\geq$ 16, triage positive      | 91.7 (90.8-92.5) |                   | 3669                   | 332                 |
| If ISS $\geq$ 16, triage negative      | 91.8 (88.3-94.4) |                   | 291                    | 26                  |
| If ISS<16, triage positive             | 81.8 (81.3-82.3) |                   | 17658                  | 3929                |
| If ISS<16, triage negative             | 69.2 (68.5-69.9) |                   | 11450                  | 5096                |
| Transfer from non TC to TC             |                  |                   |                        |                     |
| If ISS $\geq$ 16                       |                  |                   |                        |                     |
| If triage positive                     | 26.5 (22.8-30.6) |                   | 90                     | 248                 |
| If triage negative                     | 32.5 (27.7-37.6) | 110               | 228                    |                     |
| If ISS<16                              |                  |                   |                        |                     |
| If triage positive                     | 7.4 (6.7-8.1)    | 393               | 4918                   |                     |



|  |                                        |                        |                   |        |        |
|--|----------------------------------------|------------------------|-------------------|--------|--------|
|  | If triage negative                     | 4.3 (4.1-4.6)          |                   | 228    | 5083   |
|  | In-hospital mortality                  |                        |                   |        |        |
|  | If ISS $\geq$ 16                       |                        |                   | 0.045  |        |
|  | Treated in level 1 TC                  | 10.0 (9.2-10.9)        |                   | 514    | 4623   |
|  | RR if treated in level 2 TC            | 1                      | N/A               | N/A    |        |
|  | RR if treated in non-TC                | 1.25 (1.00-1.58)       | log normal        | 0.2231 | 0.1138 |
|  | If ISS<16                              | 1.2 (1.2-1.3)          | beta              | 898    | 73900  |
|  | 1-y mortality after initial discharge  |                        |                   |        |        |
|  | If ISS $\geq$ 16                       |                        |                   |        |        |
|  | Treated in TC                          | 3.0 (2.5-3.5)          | beta              | 138    | 4470   |
|  | Relative risk if treated in non-TC     | 1.64 (1.08-2.49)       | log normal        | 0.4947 | 0.2131 |
|  | If ISS<16                              | 1.7 (1.6-1.8)          | beta              | 1256   | 72614  |
|  | Baseline lifetime mortality after 1-y  | age-specific           | N/A               |        |        |
|  | Hazard ratios for lifetime mortality   |                        |                   |        |        |
|  | If ISS $\geq$ 16                       | 5.19 (3.94-6.52)       | log normal        | 1.6467 | 0.1406 |
|  | If ISS<16                              | 1.38 (1.09-1.69)       |                   | 0.3221 | 0.1204 |
|  | Utility                                |                        |                   |        |        |
|  | 1-y quality of life                    |                        |                   |        |        |
|  | If ISS $\geq$ 16                       |                        |                   |        |        |
|  | Treated in TC                          | 0.70 (0.60-0.79)       | beta <sup>†</sup> | 36     | 16     |
|  | Treated in non-TC                      | 0.68 (0.57-0.78)       |                   | 24     | 1200   |
|  | If ISS<16                              | 0.80 (0.66-0.93)       |                   | 10     | 89     |
|  | Yearly decrease in quality of life, %  | 3                      | N/A               |        |        |
|  | Cost                                   |                        |                   |        |        |
|  | Initial treatment                      |                        |                   |        |        |
|  | If ISS $\geq$ 16                       |                        |                   |        |        |
|  | Level 1 TC                             | 33,525 (32,724-34,326) | Gamma             | 6,732  | 0.2008 |
|  | Level 2 TC                             | 26,481 (25,161-27,801) |                   | 1,548  | 0.0584 |
|  | Non TC, no transfer                    | 19,889 (18,894-20,884) |                   | 1,537  | 0.0772 |
|  | Non TC, transfer                       | 22,578 (20,908-24,247) |                   | 704    | 0.0311 |
|  | If ISS<16                              |                        |                   |        |        |
|  | Level 1 TC                             | 24,903 (24,370-25,436) |                   | 8,388  | 0.3368 |
|  | Level 2 TC                             | 19,835 (19,453-20,217) |                   | 10,359 | 0.5222 |
|  | Non TC, no transfer                    | 14,255 (13,928-14,582) |                   | 7,302  | 0.5122 |
|  | Non TC, transfer                       | 16,178 (15,685-16,672) |                   | 4,139  | 0.2558 |
|  | 1-y post-injury treatment              |                        |                   |        |        |
|  | If ISS $\geq$ 16                       |                        |                   |        |        |
|  | TC (level 1 and 2, including transfer) | 35,081 (31,509-38,653) |                   | 96     | 0.0027 |
|  | Non TC                                 | 34,442 (31,230-37,654) |                   | 115    | 0.0033 |

|  |                                               |                       |            |                  |
|--|-----------------------------------------------|-----------------------|------------|------------------|
|  | If ISS<16                                     |                       |            |                  |
|  | TC (level 1 and 2, including transfer)        | 9,300 (8,300-10,200)  |            | 86<br>0.0093     |
|  | Non TC                                        | 10,400 (9,600-11,300) |            | 169<br>0.0163    |
|  | % Increase in lifetime healthcare expenditure |                       |            |                  |
|  | If ISS $\geq$ 16                              | 1.45 (1.10-1.81)      | log normal | 0.3716<br>0.1409 |
|  | If ISS<16                                     | 1.25 (1.02-1.57)      |            | 0.2231<br>0.1037 |
|  | Yearly decrease in cost, %                    | 3                     | N/A        |                  |

\*For number n of probability values that should add up to 100%, we only vary number n-1 of probability values at the same time.

†For the groups 'ISS $\geq$ 16 and treated in non-TC' and 'ISS<16', we vary the utility difference compared to the baseline group 'ISS $\geq$ 16 and treated in non-TC'.

TC, trauma center; ISS, Injury Severity Score.
